# Supplementary material for: Evaluation of a maternity waiting home and community education program in two districts of Malawi
Source: Springer Nature journal article supplement (doi:10.1186/s12884-018-2084-7), 2018-11-23
Supplement: MOESM1 [file 16291166]

**UNC PROJECT MALAWI  
UNIVERSITY OF NORTH CAROLINA (UNC)**

**EXIT CLIENT**

**QUESTIONNAIRE NUMBER: \_\_ \_\_**

|                                                                                                                                                             |            |            |
|-------------------------------------------------------------------------------------------------------------------------------------------------------------|------------|------------|
| Facility:                                                                                                                                                   | 01=Area 25 | 02=Kasungu |
| Interviewer code:                                                                                                                                           |            |            |
| Date of Interview: __ __/ __ __/ __ __ (DD/MM/YY)                                                                                                           |            |            |
| Interview start time: __ __: __ __ HH:MM (GMT)    Interview end time: __ __: __ __ HH:MM (GMT)                                                              |            |            |
| CLINIC WHERE EXIT INTERVIEW TAKES PLACE: 1=Delivery services<br>2=Postnatal care services<br>3=Child wellness services (child ≤ 3 months)                   |            |            |
| FOR CHILD WELLNESS AND POSTNATAL CARE CLIENTS ONLY: Has she been interviewed by the Evaluation of the Safe Motherhood Project previously in the last month? |            |            |
| YES   (IF YES, THANK THE RESPONDENT BUT DO NOT CONDUCT THE INTERVIEW.)<br>NO    Continue with the interview                                                 |            |            |

**EXIT INTERVIEW WITH POST-DELIVERY, PNC AND CHILD HEALTH CLIENTS**

We would like to ask you a few questions to gain an understanding of maternal and newborn services in your area.

|     | <b>QUESTIONS</b>                                                                  | <b>CODING</b>                                                                                                                                                                                               | <b>SKIP/NOTES</b>       |
|-----|-----------------------------------------------------------------------------------|-------------------------------------------------------------------------------------------------------------------------------------------------------------------------------------------------------------|-------------------------|
| Q1  | In what month and year were you born?                                             | MONTH [ ][ ]<br>YEAR [ ][ ][ ][ ]                                                                                                                                                                           |                         |
| Q2  | How old were you on your last birthday?<br>COMPARE AND CORRECT Q1 IF INCONSISTENT | AGE IN COMPLETED YEARS [ ][ ]                                                                                                                                                                               |                         |
| Q3  | Have you ever attended school?                                                    | 1=YES<br>2=NO                                                                                                                                                                                               | 2→Q5                    |
| Q4a | What is the highest level of school you have completed?                           | 1=PRESCHOOL<br>2=PRIMARY<br>3=SECONDARY<br>4=HIGHER THAN SECONDARY<br>96=DON'T KNOW                                                                                                                         |                         |
| Q4b | What is the highest (class/form/year) you completed at that level?                | CLASS/FORM/YEAR [ ][ ]                                                                                                                                                                                      |                         |
| Q5  | What is your current working status?<br><br>PROBE. CIRCLE ALL MENTIONED           | A=UNPAID FAMILY WORKER/HOUSEWIFE/AGRIC WORKER<br>B=UNEMPLOYED<br>C=SELF-EMPLOYED<br>D=EMPLOYEE-FORMAL WORK (PAID)<br>E=INFORMAL WORK (PAID)<br>F=OTHER _____<br>(SPECIFY)                                   |                         |
| Q6  | What is your current marital status?                                              | 1=MARRIED OR LIVING TOGETHER<br>2=DIVORCED/SEPARATED<br>3=WIDOWED<br>4=NEVER MARRIED AND NEVER LIVED TOGETHER                                                                                               | 2→Q10<br>3→Q10<br>4→Q10 |
| Q7  | Has your husband ever attended school?                                            | 1=YES<br>2=NO<br>96=DON'T KNOW                                                                                                                                                                              | 2→Q9<br>96→Q9           |
| Q8a | What is the highest level of school your husband has completed?                   | 1=PRESCHOOL<br>2=PRIMARY<br>3=SECONDARY<br>4=HIGHER THAN SECONDARY<br>96=DON'T KNOW                                                                                                                         |                         |
| Q8b | What is the highest (class/form/year) your husband completed                      | CLASS/FORM/YEAR [ ][ ]<br>DON'T KNOW 96                                                                                                                                                                     |                         |
| Q9  | What is your husband's usual working status?<br><br>PROBE. CIRCLE ALL MENTIONED   | A=UNPAID FAMILY WORKER/FARMER<br>B=UNEMPLOYED<br>C=SELF-EMPLOYED<br>D=EMPLOYEE-FORMALWORK (PAID)<br>E=INFORMAL WORK (PAID)<br>F=OTHER _____<br>(SPECIFY)                                                    |                         |
| Q10 | What is the size of your household?                                               | _____ (NUMBER)                                                                                                                                                                                              |                         |
| Q11 | Who is the head of your family?                                                   | 01=SELF<br>02=HUSBAND<br>03=DAUGHTER<br>04=DAUGHTER-IN-LAW<br>05=GRANDCHILD<br>06=MOTHER<br>07=MOTHER-IN-LAW<br>08=SISTER<br>09=OTHER RELATIVE<br>10=ADOPTED/FOSTER/STEPCHILD<br>11=NOT RELATED<br>12=OTHER |                         |

|      |                                                                                                                |                                                                                                                                                                                                                       |                                                                          |  |
|------|----------------------------------------------------------------------------------------------------------------|-----------------------------------------------------------------------------------------------------------------------------------------------------------------------------------------------------------------------|--------------------------------------------------------------------------|--|
| Q13  | What is the main source of drinking water in your household?                                                   | 1=PIPE INSIDE<br>2=PIPE OUTSIDE<br>3=TANKER<br>4=SPRING/RAIN<br>5=WELL                                                                                                                                                | 6=BOREHOLE<br>7=RIVER/STREAM<br>8=DUGOUT<br>9=PACKET WATER<br>10=OTHER   |  |
| Q14  | What is the type of toilet in your household?                                                                  | 1=WATER CLOSET<br>2=PIT LATRINE IN HOUSE<br>3=KVIP IN HOUSE<br>4=BUCKET/PAN                                                                                                                                           | 5=PUBLIC TOILET<br>6=COMMUNAL TOILET<br>7=BUSH/FREE RANGE<br>8=OTHER     |  |
| Q15  | What fuel do you mainly use for cooking?                                                                       | 1=WOOD<br>2=ELECTRICITY<br>3=KEROSENE/PARAFIN<br>4=CHARCOAL<br>5=ANIMAL/CROP WASTE                                                                                                                                    | 6=SAWDUST<br>7=LPG GAS<br>8=BIOGAS<br>9=NO FOOD COOKED IN HH<br>10=OTHER |  |
| Q16a | How far is your household from this facility?                                                                  | _____ (KILOMETERS)<br>996=DON'T KNOW                                                                                                                                                                                  |                                                                          |  |
| Q16b | How long did it take for you to get from your home to this facility?                                           | TIME IN MINUTES: _____                                                                                                                                                                                                | (CONVERT TO MINUTES IF GIVEN IN HOURS)                                   |  |
| Q16c | What means of transport did you use to get to the facility? Was it your own or a paid vehicle (if applicable)? | 1= WALK<br>2=BICYCLE (paid)<br>3=BICYCLE (personal)<br>4=MOTORCYCLE (paid)<br>5=MOTORCYCLE (personal)<br>6=BUS/TAXI/CAR (paid)<br>7=PERSONAL CAR<br>8=AMBULANCE/HEALTH FACILITY VEHICLE<br>9=OTHER _____<br>(SPECIFY) |                                                                          |  |

**PREGNANCY HISTORY**

Now I would like to ask some questions about your pregnancy and birth history.

|     | <b>QUESTIONS</b>                                                                                                                                       | <b>CODING</b>                                                                        | <b>SKIP/NOTES</b>                          |
|-----|--------------------------------------------------------------------------------------------------------------------------------------------------------|--------------------------------------------------------------------------------------|--------------------------------------------|
| Q17 | What was the outcome of your recent pregnancy?                                                                                                         | 1=LIVE BIRTH<br>2=STILLBIRTH<br>3=MISCARRIAGE<br>4=LIVE BIRTH THAT DIED WITHIN 1 DAY |                                            |
| Q18 | Prior to your most recent pregnancy, how many previous pregnancies have you had?                                                                       | _____ (RECORD NUMBER OF PREGNANCIES)                                                 | If zero, skip to Q26                       |
| Q19 | What was the outcome of the next most recent pregnancy?                                                                                                | 1=LIVE BIRTH<br>2=STILLBIRTH<br>3=MISCARRIAGE<br>4=LIVE BIRHT THAT DIED WITHIN 1 DAY |                                            |
| Q20 | Between the end of your next most recent pregnancy (live birth or another outcome) and the delivery for this recent pregnancy, how many months passed? | _____ (RECORD NUMBER OF MONTHS)                                                      |                                            |
| Q21 | How many live born children have you ever given birth to (including this birth)?                                                                       | _____ (RECORD NUMBER OF LIVE BIRTHS)                                                 | If "none" skip to Q26                      |
| Q22 | Sometimes bad things happen, have you ever had any of your live born children die?                                                                     | 1=YES<br>2=NO<br>96=PREFER NOT TO ANSWER                                             | If No or prefer not to answer, skip to Q26 |
| Q23 | How many children have died?                                                                                                                           | _____ (NUMBER)                                                                       |                                            |
| Q24 | Have you ever had any live born children die within the first year of life?                                                                            | 1=YES<br>2=NO<br>96=PREFER NOT TO ANSWER                                             | If No or prefer not to answer, skip to Q26 |
| Q25 | Among those that died in the first year of life, how many died in the first month                                                                      | _____ (NUMBER)                                                                       |                                            |

**ANC, DELIVERY AND PNC, CHILD HEALTH**

Now I would like to ask some questions about your use of maternal and newborn services.

|     | <b>QUESTIONS</b>                                                                                                  | <b>CODING</b>                                                                                                                                                                                                      | <b>SKIP/NOTES</b>   |
|-----|-------------------------------------------------------------------------------------------------------------------|--------------------------------------------------------------------------------------------------------------------------------------------------------------------------------------------------------------------|---------------------|
| Q26 | Are you here for post-delivery discharge, postnatal care, or a child health visit?                                | 1=DELIVERY<br>2=POSTNATAL CARE<br>3=CHILD HEALTH VISIT                                                                                                                                                             |                     |
| Q27 | How many facility-based antenatal visits did you attend for your most recent pregnancy?<br><br>IF NONE, CODE ZERO | _____ NUMBER OF VISITS<br>96=DON'T REMEMBER                                                                                                                                                                        | If zero, skip to 29 |
| Q28 | How many months pregnant were you when you first received antenatal care for your recent pregnancy?               | _____ NUMBER OF MONTHS                                                                                                                                                                                             |                     |
| Q29 | Where did you deliver your child?                                                                                 | 1 = AT THIS FACILITY<br>2 = ANOTHER HEALTH FACILITY<br>3 = AT HOME<br>4 = OTHER _____<br>(SPECIFY)                                                                                                                 |                     |
| Q30 | Who delivered your baby?<br><br>PROBE. CIRCLE ALL MENTIONED.                                                      | A=DOCTOR<br>B=MIDWIFE/NURSE<br>C=OTHER HEALTH WORKER<br>D=TRADITIONAL BIRTH ATTENDANT<br>E=FAMILY MEMBER<br>F=NO ONE<br>G=NOT SURE<br>X=OTHER _____<br>(SPECIFY)                                                   |                     |
| Q31 | Did you use a Maternity Waiting Home for this pregnancy and/or post-delivery?                                     | 1=YES<br>2=NO                                                                                                                                                                                                      | 2→Q43 FILTER        |
| Q32 | What is the name of the Maternity Waiting Home?                                                                   | 1=AREA 25<br>2=KASUNGU<br>3=OTHER _____<br>(SPECIFY)                                                                                                                                                               |                     |
| Q33 | How many months pregnant were you when you first came to the Maternity Waiting Home?                              | _____ (NUMBER OF MONTHS)<br>88 (CIRCLE 88 IF POST DELIVERY)                                                                                                                                                        |                     |
| Q34 | Who decided that you should seek care at a Maternity Waiting Home?<br><br>PROBE: CIRCLE ALL MENTIONED.            | A=RESPONDENT<br>B=SPOUSE<br>C=MOTHER-IN-LAW<br>D=OTHER FAMILY MEMBER<br>E=HEALTH WORKER<br>F=TRADITIONAL BIRTH ATTENDANT<br>G=TRADITIONAL HEALER<br>H=OTHER _____<br>(SPECIFY)                                     |                     |
| Q35 | How did you learn about the Maternity Waiting Home?<br><br>PROBE: CIRCLE ALL MENTIONED.                           | A=OUTREACH EVENT<br>B=HEALTH WORKER<br>C=RADIO<br>D=TELEVISION<br>E=TRIBAL AUTHORITY LEADER/CHIEF<br>F=TRADITIONAL BIRTH ATTENDANT<br>G=TRADITIONAL HEALER<br>H=FRIEND/FAMILY MEMBER<br>I=OTHER _____<br>(SPECIFY) |                     |
| Q36 | What were the reasons for seeking care at a Maternity Waiting Home?<br><br>PROBE: CIRCLE ALL MENTIONED            | A=FOR A GOOD PREGNANCY OUTCOME<br>B=COMPLICATIONS<br>C=PREVIOUS USE OF A MATERNITY WAITING HOME<br>D=REFERRAL FROM A HEALTH FACILITY OR A HEALTH WORKER<br>E=RECOMMENDED BY A FAMILY MEMBER OR FRIEND              |                     |

|      |                                                                                                                                                                            |                                                                                                                                                                                                                                                                                                                                                                                                                                                                                                                                                                                             |                   |
|------|----------------------------------------------------------------------------------------------------------------------------------------------------------------------------|---------------------------------------------------------------------------------------------------------------------------------------------------------------------------------------------------------------------------------------------------------------------------------------------------------------------------------------------------------------------------------------------------------------------------------------------------------------------------------------------------------------------------------------------------------------------------------------------|-------------------|
|      |                                                                                                                                                                            | F=OTHER _____<br>(SPECIFY)                                                                                                                                                                                                                                                                                                                                                                                                                                                                                                                                                                  |                   |
| Q37  | While at the Maternity Waiting Home for the most recent pregnancy, did you attend any educational sessions?                                                                | 1=YES<br>2=NO<br>96=DON'T KNOW/DON'T REMEMBER                                                                                                                                                                                                                                                                                                                                                                                                                                                                                                                                               | 2→Q40<br>96→Q40   |
| Q38  | Which educational sessions did you attend?<br><br>PROBE. CIRCLE ALL MENTIONED                                                                                              | A=HEALTH EDUCATION<br>B=NUTRITIONAL EDUCATION<br>C=HOME CRAFT (PREPARATION OF FOODS)<br>D=OTHER _____<br>(SPECIFY)                                                                                                                                                                                                                                                                                                                                                                                                                                                                          |                   |
| Q39  | What topics were covered during the training?<br><br>PROBE. CIRCLE ALL MENTIONED                                                                                           | A=DANGER SIGNS IN PREGNANCY<br>B=PERSONAL AND ENVIRONMENTAL HYGIENE<br>C=NUTRITION IN PREGNANCY and POSTNATAL<br>D=POSTPARTUM FAMILY PLANNING<br>E=BIRTH PREPAREDNESS<br>F=PREVENTION OF MOTHER TO CHILD TRANSMISSION OF HIV<br>G=NEONATAL CARE<br>H=IMMUNISATIONS (MOTHER AND BABY)<br>I=EXCLUSIVE BREASTFEEDING<br>J=POSTNATAL CARE<br>K=DANGER SIGNS POST DELIVERY (MOTHER, BABY)<br>L=HEALTHY LIVING THROUGH ACTIVITIES (SEWING, M=GARDENING/PERMACULTURE, EXERCISE)<br>N=MALE CHAMPIONSHIP OF HEALTH<br>O=INFECTIONS IN PREGNANCY (including HIV)<br>P=OTHER _____<br>X=DON'T REMEMBER |                   |
| Q40  | While at the Maternity Waiting Home, did you receive antenatal care?                                                                                                       | 1=YES<br>2=NO<br>96=DON'T KNOW/DON'T REMEMBER                                                                                                                                                                                                                                                                                                                                                                                                                                                                                                                                               | 2→Q42a<br>96→Q42a |
| Q41  | How many antenatal care visits did you receive while at the Maternity Waiting Home?                                                                                        | _____ NUMBER OF VISITS<br>96= don't remember                                                                                                                                                                                                                                                                                                                                                                                                                                                                                                                                                |                   |
| Q42a | Would you recommend this Maternal Waiting Home to your friends and family?                                                                                                 | 1=YES<br>2=NO                                                                                                                                                                                                                                                                                                                                                                                                                                                                                                                                                                               |                   |
| Q42b | How satisfied were you with the quality of services at the Maternity Waiting Home (very satisfied, satisfied, neutral, unsatisfied, very unsatisfied)?                     | 5=VERY SATISFIED<br>4=SATISFIED<br>3=NEUTRAL<br>2=UNSATISFIED<br>1=VERY UNSATISFIED                                                                                                                                                                                                                                                                                                                                                                                                                                                                                                         |                   |
| Q42c | How satisfied were you with the quality of educational messages at the Maternity Waiting Home (very satisfied, satisfied, neutral, unsatisfied, very unsatisfied)?         | 5=VERY SATISFIED<br>4=SATISFIED<br>3=NEUTRAL<br>2=UNSATISFIED<br>1=VERY UNSATISFIED                                                                                                                                                                                                                                                                                                                                                                                                                                                                                                         | ALL GO TO Q44     |
| Q43a | FOR WOMAN WHO DID NOT DELIVER IN A HEALTH FACILITY ONLY (Q29=3, 4 OR OTHER)<br>Why did you not deliver your baby in a health facility?<br><br>PROBE. CIRCLE ALL MENTIONED. | A=DISTANCE<br>B=LACK OF KNOWLEDGE<br>C=DIDN'T FEEL IT WAS NEEDED<br>D=LACK OF TRANSPORTATION<br>E=PERMISSION NOT GRANTED<br>F=COSTS<br>G=PERCEPTION OF QUALITY<br>H=PERCEPTION OF HEALTH WORKER ATTITUDES<br>I=PERCEPTION OF HEALTH WORKER AVAILABILITY<br>J=MIDWIFE NOT AVAILABLE<br>K=DOCTOR NOT AVAILABLE<br>L=CROWDING/WAITING TIME<br>M=FEAR OF FACILITIES<br>N=AVAILABILITY OF A TRAINED TBA<br>O=DELIVERED ON THE WAY TO THE FACILITY                                                                                                                                                |                   |

|      |                                                                                                                                                          |                                                                                                                                                                                                                    |                           |
|------|----------------------------------------------------------------------------------------------------------------------------------------------------------|--------------------------------------------------------------------------------------------------------------------------------------------------------------------------------------------------------------------|---------------------------|
|      |                                                                                                                                                          | X=OTHER _____<br>(SPECIFY)                                                                                                                                                                                         |                           |
| Q43b | FOR WOMAN WHO DID NOT USE A MATERNITY WAITING HOME ONLY (Q31=2) Did you know that this facility had a Maternity Waiting Home before you came here today? | 1=YES<br>2=NO<br>3= DOESN'T KNOW WHAT A MATERNITY WAITING HOME IS                                                                                                                                                  |                           |
| Q44  | Have you used a Maternity Waiting Home for a prior pregnancy?                                                                                            | 1=YES<br>2=NO<br>3=FIRST PREGNANCY                                                                                                                                                                                 |                           |
| Q45  | During your most recent pregnancy were you told about possible pregnancy complications?                                                                  | 1=YES<br>2=NO<br>96=DON'T KNOW/DON'T REMEMBER                                                                                                                                                                      | 2→Q48<br>96→Q48           |
| Q46  | What were the complications you were told about?<br><br>PROBE. CIRCLE ALL MENTIONED.                                                                     | A=BLEEDING<br>B=FEVER<br>C=SWOLLEN HANDS/FACE/FEET<br>D=TIREDDNESS/BREATHLESSNESS<br>E=HEADACHE/BLURRED VISION<br>F=CONVULSIONS<br>G=PROLONGED LABOR<br>H=HIV INFECTIONS<br>I=ANEMIA<br>J=OTHER _____<br>(SPECIFY) |                           |
| Q47  | Where did you get information on possible pregnancy complications?<br><br>PROBE. CIRCLE ALL MENTIONED                                                    | A=MATERNITY WAITING HOME<br>B=HEALTH FACILITY<br>C=HEALTH WORKER<br>D=TRADITIONAL BIRTH ATTENDANT<br>E=FAMILY MEMBER/FRIEND<br>F=OTHER _____<br>(SPECIFY)                                                          |                           |
| Q48  | Were you told that you might be at high risk for a pregnancy complication?                                                                               | 1=YES<br>2=NO                                                                                                                                                                                                      |                           |
| Q49  | Did you experience any pregnancy related complications for your most recent pregnancy?                                                                   | 1=YES<br>2=NO                                                                                                                                                                                                      |                           |
| Q50  | During antenatal care were you told about newborn complications?                                                                                         | 1=YES<br>2=NO<br>96=DON'T KNOW/DON'T REMEMBER<br>98=NO ANTENATAL CARE                                                                                                                                              | 2→Q53<br>96→Q53<br>98→Q53 |

|     |                                                                                                          |                                                                                                                                                                                                                                         |                 |
|-----|----------------------------------------------------------------------------------------------------------|-----------------------------------------------------------------------------------------------------------------------------------------------------------------------------------------------------------------------------------------|-----------------|
| Q51 | What were the complications you were told about?<br>PROBE: CIRCLE ALL MENTIONED.                         | A=FEVER<br>B=DIFFICULTY BREATHING<br>C=COUGHING<br>D=DIARRHEA<br>E=JAUNDICE<br>F=INABILITY TO FEED<br>G=UMBILICAL CORD INFECTION<br>H=PRETERM/EARLY BIRTH<br>I=OTHER _____<br>(SPECIFY)                                                 |                 |
| Q52 | Where did you get information on possible newborn complications?<br>PROBE. CIRCLE ALL MENTIONED.         | A=MATERNITY WAITING HOME<br>B=HEALTH FACILITY<br>C=HEALTH WORKER<br>D=TRADITIONAL BIRTH ATTENDANT<br>E=FAMILY MEMBER/FRIEND<br>F=OTHER _____<br>(SPECIFY)                                                                               |                 |
| Q53 | Did your newborn experience any complications during delivery or shortly afterwards?                     | 1=YES<br>2=NO                                                                                                                                                                                                                           |                 |
| Q54 | During pregnancy or after delivery were you given any health messages about breastfeeding?               | 1=YES<br>2=NO<br>3=DON'T KNOW/DON'T REMEMBER                                                                                                                                                                                            |                 |
| Q55 | What are some things you can do to take care of yourself after delivery?<br>PROBE. CIRCLE ALL MENTIONED. | A=EAT WELL<br>B=REST<br>C=BREASTFEED THE BABY<br>D=WATCH FOR SIGNS OF COMPLICATIONS<br>F=OTHER _____<br>(SPECIFY)                                                                                                                       |                 |
| Q56 | What are some important practices for taking care of a newborn?<br>PROBE. CIRCLE ALL MENTIONED.          | A=KEEPING THE BABY WARM<br>B=CLEAN CORD CARE<br>C=WATCHING FOR SIGNS OF SICKNESS/COMPLICATIONS<br>D=POSTNATAL CHECKS<br>E=IMMUNIZATIONS<br>F=SAFE DISPOSAL OF FECES<br>G=WASHING HANDS<br>H=BREASTFEEDING<br>I=OTHER _____<br>(SPECIFY) |                 |
| Q57 | When should breastfeeding be initiated?                                                                  | 1=IMMEDIATELY/WITHIN AN HOUR OF BIRTH<br>2=WITHIN A DAY<br>3=WITHIN A FEW DAYS<br>4=OTHER _____<br>(SPECIFY)                                                                                                                            |                 |
| Q58 | How long should a baby be exclusively breastfed?                                                         | 1=NOT AT ALL<br>2=FOR A FEW DAYS<br>3=FOR LESS THAN 6 MONTHS<br>4=FOR 6 MONTHS<br>5=FOR MORE THAN 6 MONTHS<br>4=OTHER _____<br>(SPECIFY)                                                                                                |                 |
| Q59 | Can HIV be transmitted from mother-to-child?                                                             | 1=YES<br>2=NO<br>96=DON'T KNOW/DON'T REMEMBER                                                                                                                                                                                           | 2→Q62<br>96→Q62 |
| Q60 | In what ways can HIV be transmitted from mother-to-child?<br>PROBE. CIRCLE ALL MENTIONED.                | A=DURING PREGNANCY<br>B=DURING DELIVERY<br>C=WHILE BREASTFEEDING<br>D=DON'T KNOW                                                                                                                                                        |                 |
| Q61 | Are there medicines that can help prevent a baby whose mother is HIV-positive from getting HIV?          | 1=YES<br>2=NO<br>3=DON'T KNOW/DON'T REMEMBER                                                                                                                                                                                            |                 |
| Q62 | For the health of the mother and baby what is a good interval (in months) between the birth of children? | 1=LESS THAN 1 YEAR<br>2=2 YEARS<br>3=3 YEARS<br>4=4-5 YEARS                                                                                                                                                                             |                 |



|      |                                                                                                                                                               |                                                                                                                                                                                                                                                                                  |                  |
|------|---------------------------------------------------------------------------------------------------------------------------------------------------------------|----------------------------------------------------------------------------------------------------------------------------------------------------------------------------------------------------------------------------------------------------------------------------------|------------------|
|      |                                                                                                                                                               | 5=MORE THAN 5 YEARS<br>6=DON'T KNOW/REMEMBER<br>7=OTHER _____<br>(SPECIFY)                                                                                                                                                                                                       |                  |
| Q63  | In your opinion how important are immunizations for your children (very important, important, neutral, unimportant, very unimportant)?                        | 5=VERY IMPORTANT<br>4=IMPORTANT<br>3=NEUTRAL<br>2=UNIMPORTANT<br>1=VERY UNIMPORTANT                                                                                                                                                                                              |                  |
| Q64  | In your opinion how important are postnatal checks for yourself (very important, important, neutral, unimportant, very unimportant)?                          | 5=VERY IMPORTANT<br>4=IMPORTANT<br>3=NEUTRAL<br>2=UNIMPORTANT<br>1=VERY UNIMPORTANT                                                                                                                                                                                              |                  |
| Q65  | In your opinion how important are postnatal checks for your baby (very important, important, neutral, unimportant, very unimportant)?                         | 5=VERY IMPORTANT<br>4=IMPORTANT<br>3=NEUTRAL<br>2=UNIMPORTANT<br>1=VERY UNIMPORTANT                                                                                                                                                                                              |                  |
| Q66  | In your opinion how important is it for a woman to deliver her baby in a health facility (very important, important, neutral, unimportant, very unimportant)? | 5=VERY IMPORTANT<br>4=IMPORTANT<br>3=NEUTRAL<br>2=UNIMPORTANT<br>1=VERY UNIMPORTANT                                                                                                                                                                                              |                  |
| Q67a | Have you initiated breastfeeding                                                                                                                              | 1=YES<br>2=NO<br>3=HAD A STILLBIRTH/MISCARRIAGE                                                                                                                                                                                                                                  | 2→Q68a<br>3→Q68a |
| Q67b | When did your baby first start breastfeeding                                                                                                                  | 1=IMMEDIATELY AFTER BIRTH<br>2=WITHIN THE FIRST HOUR AFTER BIRTH<br>3=WITHIN THE FIRST DAY AFTER BIRTH<br>4=OTHER _____<br>(SPECIFY)                                                                                                                                             |                  |
| Q68a | Before you became pregnant with your most recent pregnancy, did you ever use a family planning method prior to your most recent pregnancy?                    | 1=YES<br>2=NO                                                                                                                                                                                                                                                                    | 2→Q69            |
| Q68b | What method did you ever use prior to getting pregnant?<br><br>CIRCLE ALL MENTIONED                                                                           | A=NATURAL FAMILY PLANNING/WITHDRAWAL<br>B=BREASTFEEDING<br>C=MALE CONDOM<br>D=FEMALE CONDOM<br>E=ORAL CONTRACEPTIVES<br>F=EMERGENCY CONTRACEPTIVE PILL<br>G=INJECTION<br>H=IMPLANT<br>I=IUD/LOOP<br>J=MALE STERILIZATION<br>K=FEMALE STERILIZATION<br>L=OTHER _____<br>(SPECIFY) |                  |
| Q69  | Were you counselled on family planning during your most recent pregnancy or after your most recent delivery?                                                  | 1=YES<br>2=NO<br>3=DON'T KNOW/DON'T REMEMBER                                                                                                                                                                                                                                     | 2→71<br>3→71     |
| Q70  | What family planning methods were you counselled on?<br><br>PROBE. CIRCLE ALL MENTIONED.                                                                      | A=NATURAL FAMILY PLANNING/WITHDRAWAL<br>B=BREASTFEEDING<br>C=MALE CONDOM<br>D=FEMALE CONDOM<br>E=ORAL CONTRACEPTIVES<br>F=EMERGENCY CONTRACEPTIVE PILL<br>G=INJECTION<br>H=IMPLANT<br>I=IUD<br>J=MALE STERILIZATION                                                              |                  |

|                                                                                                                                                                              |                                                                                                        |                                                                                                                                                                                                                                                                                                   |                             |
|------------------------------------------------------------------------------------------------------------------------------------------------------------------------------|--------------------------------------------------------------------------------------------------------|---------------------------------------------------------------------------------------------------------------------------------------------------------------------------------------------------------------------------------------------------------------------------------------------------|-----------------------------|
|                                                                                                                                                                              |                                                                                                        | K=FEMALE STERILIZATION<br>L=OTHER _____<br>(SPECIFY)                                                                                                                                                                                                                                              |                             |
| Q71                                                                                                                                                                          | In your opinion should men be involved in maternal health care?                                        | 1=YES<br>2=NO<br>3=DON'T KNOW                                                                                                                                                                                                                                                                     |                             |
| Q72                                                                                                                                                                          | In your opinion should men be involved in newborn health care?                                         | 1=YES<br>2=NO<br>3=DON'T KNOW                                                                                                                                                                                                                                                                     |                             |
| Q73                                                                                                                                                                          | Did your community hold any events to promote the use of maternal health care services?                | 1=YES<br>2=NO                                                                                                                                                                                                                                                                                     | 2→Q76                       |
| Q74                                                                                                                                                                          | Who conducted the events?<br><br>PROBE. CIRCLE ALL MENTIONED.                                          | A=TRIBAL AUTHORITY LEADER/CHIEF<br>B=VILLAGE ELDERS<br>C=HEALTH WORKERS<br>D=TRADITIONAL BIRTH ATTENDANTS<br>E=WOMEN'S GROUPS<br>F=SAFE MOTHERHOOD REPRESENTATIVE<br>G=MAI MWANA<br>H=FPAM<br>I=UNFPA<br>J=OTHER NGO<br>K=UNC/LILONGWE MEDICAL TRUST<br>L=MAIKHANDA<br>X=OTHER _____<br>(SPECIFY) |                             |
| Q75                                                                                                                                                                          | Did you attend any of the events?                                                                      | 1=YES<br>2=NO                                                                                                                                                                                                                                                                                     |                             |
| <b>FILTER 1 – THIS SECTION Q76 to Q89b IS FOR WOMEN WITH A RECENT DELIVERY OR A RECENT POSTNATAL CHECK ONLY (SKIP to Q90 FOR WOMEN BRINGING A BABY FOR A WELLNESS CHECK)</b> |                                                                                                        |                                                                                                                                                                                                                                                                                                   |                             |
| Q76                                                                                                                                                                          | For how long after delivery did you stay in the Maternity Waiting Home?                                | 0 MARK ZERO IF SHE DID NOT USE THE MWH OR IF SHE DELIVERED AT HOME AND NEVER USED MWH<br><br>_____(NUMBER OF HOURS. IF MORE THAN 1 DAY CONVERT TO HOURS)                                                                                                                                          |                             |
| Q77                                                                                                                                                                          | Did someone check on your health before you were discharged?                                           | 1=YES<br>2=NO<br>96=DID NOT DELIVER IN A FACILITY                                                                                                                                                                                                                                                 | 2→Q80<br>96→Q85a            |
| Q78                                                                                                                                                                          | Was your temperature taken before discharge?                                                           | 1=YES<br>2=NO                                                                                                                                                                                                                                                                                     |                             |
| Q79                                                                                                                                                                          | Were you checked for bleeding before discharge?                                                        | 1=YES<br>2=NO                                                                                                                                                                                                                                                                                     |                             |
| Q80                                                                                                                                                                          | Did someone check on your baby before you were discharged?                                             | 1=YES<br>2=NO<br>3=STILLBIRTH/MISCARRIAGE                                                                                                                                                                                                                                                         | 2→Q83<br>3→Q87              |
| Q81                                                                                                                                                                          | Was the baby's cord checked?                                                                           | 1=YES<br>2=NO                                                                                                                                                                                                                                                                                     |                             |
| Q82                                                                                                                                                                          | Was the baby's temperature taken?                                                                      | 1=YES<br>2=NO                                                                                                                                                                                                                                                                                     |                             |
| Q83                                                                                                                                                                          | Was the baby weighed?                                                                                  | 1=YES<br>2=NO                                                                                                                                                                                                                                                                                     |                             |
| Q84                                                                                                                                                                          | Were you taught how to keep the baby warm?                                                             | 1=YES<br>2=NO                                                                                                                                                                                                                                                                                     |                             |
| Q85a                                                                                                                                                                         | Do you intend to breastfeed your baby exclusively, that is to only provide your baby with breast milk? | 1=YES<br>2=NO<br>96=DON'T KNOW                                                                                                                                                                                                                                                                    | 2→Q86<br>96→Q86             |
| Q85b                                                                                                                                                                         | For how long do you intend to exclusively breastfeed your baby?                                        | _____(NUMBER OF MONTHS)                                                                                                                                                                                                                                                                           | FOR ALL RESPONSES GO TO Q87 |
| Q86                                                                                                                                                                          | Do you intend to breastfeed your baby at all?                                                          | 1=YES<br>2=NO<br>96=DON'T KNOW                                                                                                                                                                                                                                                                    |                             |
| Q87                                                                                                                                                                          | Are you currently using a family planning method?                                                      | 1=YES<br>2=NO                                                                                                                                                                                                                                                                                     | 2→Q89a                      |

|                                                                                  |                                                                                                        |                                                                                                                                                                                                                                                                             |                                                                |
|----------------------------------------------------------------------------------|--------------------------------------------------------------------------------------------------------|-----------------------------------------------------------------------------------------------------------------------------------------------------------------------------------------------------------------------------------------------------------------------------|----------------------------------------------------------------|
| Q88                                                                              | Which family planning method are you using?                                                            | A=NATURAL FAMILY PLANNING/WITHDRAWAL<br>B=BREASTFEEDING<br>C=MALE CONDOM<br>D=FEMALE CONDOM<br>E=ORAL CONTRACEPTIVES<br>F=EMERGENCY CONTRACEPTIVE PILL<br>G=INJECTION<br>H=IMPLANT<br>I=IUD<br>J=MALE STERILIZATION<br>K=FEMALE STERILIZATION<br>L=OTHER _____<br>(SPECIFY) | FOR ALL RESPONSES<br>END INTERVIEW                             |
| Q89a                                                                             | Do you plan to use a family planning method in the next six months?                                    | 1=YES<br>2=NO<br>3=DON'T KNOW                                                                                                                                                                                                                                               | IF YES OR DON'T KNOW,<br>END INTERVIEW AND<br>THANK RESPONDENT |
| Q89b                                                                             | If you would not consider using a family planning method, why not?<br><br>PROBE. CIRCLE ALL MENTIONED. | A=WOMEN GAIN WEIGHT<br>B = WOMEN BECOME STERILE<br>C = MEN DON'T LIKE WOMEN USING CONTRACEPTIVES<br>D= FEAR OF SIDE EFFECTS<br>E= OTHER _____<br>(SPECIFY)                                                                                                                  | FOR ALL RESPONSES<br>END INTERVIEW AND<br>THANK RESPONDENT     |
| FILTER 2 – Q90 to Q104b ARE FOR WOMEN BRINGING A CHILD FOR A WELLNESS CHECK ONLY |                                                                                                        |                                                                                                                                                                                                                                                                             |                                                                |
| Q90                                                                              | How old is your baby?                                                                                  | _____ MONTHS ____ DAYS<br><br>(IF LESS THAN ONE MONTH RECORD IN DAYS. CIRCLE MONTHS OR DAYS)                                                                                                                                                                                |                                                                |
| Q91                                                                              | Has your child been very sick since birth?                                                             | 1=YES<br>2=NO                                                                                                                                                                                                                                                               | 2→Q93                                                          |
| Q92                                                                              | Did you bring your child to a health facility when he or she was sick?                                 | 1=YES<br>2=NO                                                                                                                                                                                                                                                               |                                                                |
| Q93                                                                              | Did your baby have a health check within the first two days of life?                                   | 1=YES<br>2=NO                                                                                                                                                                                                                                                               |                                                                |
| Q94                                                                              | Have you breastfed your baby exclusively, that is to only provide your baby with breast milk?          | 1=YES<br>2=NO<br>96=DON'T KNOW                                                                                                                                                                                                                                              | 2→Q98<br>96→Q98                                                |
| Q95                                                                              | For how long have you exclusively breastfed your baby?                                                 | NUMBER OF WEEKS _____<br>(IF SINCE BIRTH, INDICATE CHILD'S AGE IN WEEKS)                                                                                                                                                                                                    |                                                                |
| Q96                                                                              | Are you still exclusively breastfeeding your baby?                                                     | 1=YES<br>2=NO                                                                                                                                                                                                                                                               | 2→Q100                                                         |
| Q97                                                                              | For how long do you intend to exclusively breastfeed your baby?                                        | _____ (NUMBER OF MONTHS)                                                                                                                                                                                                                                                    | FOR ALL RESPONSES<br>SKIP TO Q100                              |
| Q98                                                                              | Have you been breastfeeding your child                                                                 | 1=YES<br>2=NO                                                                                                                                                                                                                                                               | 2→Q100                                                         |
| Q99                                                                              | For how long do you intend to breastfeed your baby?                                                    | _____ (NUMBER OF MONTHS)                                                                                                                                                                                                                                                    |                                                                |
| Q100                                                                             | Has your child received any immunizations?                                                             | 1=YES<br>2=NO                                                                                                                                                                                                                                                               | 1→Q102                                                         |
| Q101                                                                             | Do you plan to have your child immunized?                                                              | 1=YES<br>2=NO                                                                                                                                                                                                                                                               |                                                                |
| Q102                                                                             | Are you currently using a family planning method?                                                      | 1=YES<br>2=NO                                                                                                                                                                                                                                                               | 2→Q104                                                         |
| Q103                                                                             | Which family planning method are you using?                                                            | A=NATURAL FAMILY PLANNING/WITHDRAWAL<br>B=BREASTFEEDING<br>C=MALE CONDOM                                                                                                                                                                                                    | FOR ALL RESPONSES<br>END INTERVIEW                             |

|       |                                                                                                        |                                                                                                                                                                                                 |                                     |
|-------|--------------------------------------------------------------------------------------------------------|-------------------------------------------------------------------------------------------------------------------------------------------------------------------------------------------------|-------------------------------------|
|       |                                                                                                        | D=FEMALE CONDOM<br>E=ORAL CONTRACEPTIVES<br>F=EMERGENCY CONTRACEPTIVE PILL<br>G=INJECTION<br>H=IMPLANT<br>I=IUD<br>J=MALE STERILIZATION<br>K=FEMALE STERILIZATION<br>L=OTHER _____<br>(SPECIFY) |                                     |
| Q104a | Do you plan to use a family planning method in the next six months?                                    | 1=YES<br>2=NO<br>3=DON'T KNOW                                                                                                                                                                   | IF YES OR DON'T KNOW, END INTERVIEW |
| Q104b | If you would not consider using a family planning method, why not?<br><br>PROBE. CIRCLE ALL MENTIONED. | A=WOMEN GAIN WEIGHT<br>B = WOMEN BECOME STERILE<br>C = MEN DON'T LIKE WOMEN USING CONTRACEPTIVES<br>D= FEAR OF SIDE EFFECTS<br>E= OTHER _____<br>(SPECIFY)                                      |                                     |

Thank you. We very much appreciate your time. Your responses will help us improve maternal and newborn care in your area.
