# Supplementary material for: Evaluation of a maternity waiting home and community education program in two districts of Malawi
Source: BMC Pregnancy Childbirth. 2018 Nov 23;18:457. doi: 10.1186/s12884-018-2084-7 (PMC6251123; doi:10.1186/s12884-018-2084-7)
Supplement: Supplementary file 2 — Discharge Questionnaire. (PDF 201 kb) [file 12884_2018_2084_MOESM2_ESM.pdf]

## MALAWI MATERNITY WAITING HOME DISCHARGE FORM

Malawi Waiting Home Discharge Instructions:

1. Forms are administered in person by the Maternity Waiting Home Advocate in a private and quiet location.
2. Discharge form is to help assess maternity waiting home services in order to improve them, so please complete when a patient is leaving the maternity waiting home.

| DISCHARGE TOOL |                                                                                                                                                                                                                                                                                                                                                                                 |  |  |  |  |
|----------------|---------------------------------------------------------------------------------------------------------------------------------------------------------------------------------------------------------------------------------------------------------------------------------------------------------------------------------------------------------------------------------|--|--|--|--|
| 1.             | INTERVIEW INFORMATION                                                                                                                                                                                                                                                                                                                                                           |  |  |  |  |
|                | <p>A. INTERVIEWER NAME: _____</p> <p>B. DATE OF INTERVIEW:                      ____/____/____<br/>                                                                                 dd / mm / yyyy</p> <p>C. MATERNITY WAITING HOME (circle one):</p> <div style="display: flex; justify-content: flex-end; gap: 20px;"> <div>Kasungu    1</div> <div>Area 25    2</div> </div> |  |  |  |  |
| 2.             | RESPONDENT IDENTIFICATION                                                                                                                                                                                                                                                                                                                                                       |  |  |  |  |
|                | Maternity Waiting Home Registration Number                                                                                                                                                                                                                                                                                                                                      |  |  |  |  |

## SECTION 1: ABOUT YOU AND GETTING TO THE MATERNITY WAITING HOME

*The following questions ask about your background, how you got to the Maternity Waiting Home, why you came and who came with you.*

The following questions ask about your background, how you got to the Maternity Waiting Home, why you came and who came with you.

| # | Question                                                                                                                                                     | Response Options                                                                                      | Go To |
|---|--------------------------------------------------------------------------------------------------------------------------------------------------------------|-------------------------------------------------------------------------------------------------------|-------|
| 1 | Muli ndi zaka zingati?<br>What is your age?                                                                                                                  | Age in years [ ] [ ]<br>Don't know 88<br>No Response 99                                               |       |
| 2 | Mumakhala kuti?<br>Where do you live?<br>(Mudzi ndi mfumu yaikulu) Village Name & TA (write in)                                                              | Village _____<br>TA _____<br>No Response 99                                                           |       |
| 3 | Moyo wanu uli bwanji?<br>In general, how would you rate your overall health?                                                                                 | Poor 1<br>Good 2<br>Very good 3<br>Don't know 88<br>No Response 99                                    |       |
| 4 | Amene anakudikirirani ndani pamene munali kuchiyebekezero kuno?<br>Who was your guardian while you were staying at the Waiting Home? (circle all that apply) | Mother 1<br>Mother-in-law 2<br>Sister 3<br>Husband 4<br>Friend 5<br>Child 6<br>No one 7<br>Other 8    |       |
| 5 | Kodi mwakhala nthawi yaitali bwanji kunyumba yodikirai musanachire?<br>How long were you here at maternity waiting home before delivery/departure?           | Less than 1 day 1<br>1-7 days 2<br>1-2 weeks 3<br>3-4 weeks 4<br>More than 4 weeks 5<br>Don't know 88 |       |

|  |  |  |  |  |
|--|--|--|--|--|
|  |  |  |  |  |
|--|--|--|--|--|

**SECTION 2: THIS PREGNANCY**

The following questions ask information about your current pregnancy.

| #  | Question                                                                                                                                                                                     | Response Options                                                                                                                                                                                                                                                                                          | Go To              |
|----|----------------------------------------------------------------------------------------------------------------------------------------------------------------------------------------------|-----------------------------------------------------------------------------------------------------------------------------------------------------------------------------------------------------------------------------------------------------------------------------------------------------------|--------------------|
| 6  | Kodi m'mene mumabwera kuno kudzadikilira munali ndi miyezi ingati?<br>How far along were you in this pregnancy when you arrived at the maternity waiting home?                               | Almost at due date 1<br>1 month from due date 2<br>2-3 months from delivery 3<br>Half through pregnancy 4<br>N/A: already delivered 5<br>Don't know 88                                                                                                                                                    | If pregnant<br>→Q8 |
| 7a | Ngati mwabereka kale. Kodi munachira liti? If you have delivered already, how long ago did you give birth?                                                                                   | Less than 1 day 1<br>1-2 days 2<br>Other 3                                                                                                                                                                                                                                                                |                    |
| 7b | Ngati mwabereka kale, kodi zimene mukachite ndi chiani kuti mwana wanu akhale ndi moyo wathanzi?<br>If you have already delivered, what are you going to do to keep your baby in good health | Keep the baby warm 1<br>Exclusively breast feed the baby 2<br>Keep the cord stump clean 3<br>Take the baby to u/5 clinic for immunization & growth monitoring 4                                                                                                                                           |                    |
| 8  | Kodi ndi chifukwa chanji mwana akabadwa amalandira katemera?<br>Why should a new born receive immunization?                                                                                  | Don't know 1<br>To be protected from infectious diseases 2                                                                                                                                                                                                                                                |                    |
| 9a | Kodi ndi matenda ati amene mwana angatetezedwe ndi katemera?<br>What diseases can your baby be protected from by immunization? Circle all that are mentioned                                 | Measles 1<br>TB 2<br>Polio 3<br>Tetanus 4<br>Pneumonia 5<br>Whooping cough 6                                                                                                                                                                                                                              |                    |
| 9b | Kodi pali katemera woteteza amayi?<br>Ngati alipo, katemera ameneyi ndi wachiani?<br>Are there any immunizations for the mother?<br>If yes what are they?                                    | Yes 1<br>No 2<br><br>Tetanus 1<br>Others 2                                                                                                                                                                                                                                                                |                    |
| 10 | Kodi zimene mungapange ndi chiani kuti inu muzisamalire?<br>What can you do to care for yourself after delivery? (Circle all that are mentioned)                                             | Take adequate rest 1<br>Eat nutritious diet 2<br>Observe amount of vaginal bleeding 3<br>Keep fit through exercise 4<br>Maintain good personal & environmental hygiene 5<br>Report to HC if danger signs develop (such as fever, bleeding, heavy offensive vaginal discharge, blurred vision, headache) 6 |                    |
| 11 | Kodi mayi angapange chiani kuti atsamupatsire mwana wache kachirombo?<br>How can transmission of HIV from mother to child be prevented? (Circle all that are mentioned)                      | Getting tested at the beginning of ANC 1<br>Encourage partner/husband to be tested as well 2<br>Taking ARV if tested positive 3<br>Baby to receive ARV after delivery 4<br>Exclusive breast feeding for at least 6 weeks 5<br>Retesting at regular interval & avoid reinfection 6                         |                    |
| 12 | Kodi mumakonzekera bwanji mukamadikira kubadwitsa mwana?<br>What can you do to prepare for delivery? (Circle all that are mentioned)                                                         | Keep delivery bag ready with baby & mum's clothes 1<br>Discuss & organize transport with husband/partner 2<br>Prepare to wait at a MWH if health facility is far 3                                                                                                                                        |                    |
| 13 | Kodi kufunika koyamwitsa mwana bele ndi chiani?<br>What is the importance of breast feeding? (Circle all that are mentioned)                                                                 | Breast milk is the best food for baby 1<br>Breast milk contains first immunity for baby 2<br>Breast milk is always ready, doesn't need preparation 3<br>Breastfed babies don't suffer from diarrhea frequently 4<br>Breastmilk is cheap 5<br>Breastfeeding helps mother and baby to bond 6                |                    |

|  |  |  |  |  |
|--|--|--|--|--|
|  |  |  |  |  |
|--|--|--|--|--|

|             |                                                                                                                                                                               |                                                                                                                                                                                                                  |  |
|-------------|-------------------------------------------------------------------------------------------------------------------------------------------------------------------------------|------------------------------------------------------------------------------------------------------------------------------------------------------------------------------------------------------------------|--|
| <b>14 a</b> | <i>Kodi woyamwitsa anayenera kudya zakudya zamtundu wanji?</i><br>What consists of a well-balanced diet for pregnancy and lactating woman?<br>(Circle all that are mentioned) | Fish, beef, chicken 1<br>Fruits and juice 2<br>Vegetables 3<br>Water 4<br>Potatoes, maize, flour 5<br>Legumes 6                                                                                                  |  |
| <b>14 b</b> | <i>Kodi ndi chifukwa chiani mayi woyamwitsa amayenera kudya zakudya za magulu?</i> Why is it important for a pregnant and a lactating mother to eat a well-balanced diet?     | To get adequate nutrients for body functions 1<br>To maintain adequate blood level 2<br>To support immune functions 3                                                                                            |  |
| <b>15</b>   | <i>Kodi mumapanga bwanji kuti pakhomu panu pakhale paukhondo?</i><br>How do you maintain/keep personal and environmental hygiene?<br>(Circle all that are mentioned)          | Daily bath 1<br>Keep clothes clean 2<br>Change sanitary pads/towels frequently 3<br>Keep house clean & free from cockroaches/mosquitoes 4<br>Keep grounds clean 5<br>Encourage use of a pit for waste disposal 6 |  |

**SECTION 3: EDUCATION AND KNOWLEDGE**

| #         | Question                                                                                                                                                      | Response Options                                                                                                                                                                                                                                                                                                                                                                                                                                                               | Go To      |
|-----------|---------------------------------------------------------------------------------------------------------------------------------------------------------------|--------------------------------------------------------------------------------------------------------------------------------------------------------------------------------------------------------------------------------------------------------------------------------------------------------------------------------------------------------------------------------------------------------------------------------------------------------------------------------|------------|
| <b>16</b> | Did you attend any educational sessions at the Waiting Home?<br><i>Kodi manapanga nawo maphunziro ali onse panthawi imene munali kunyumba yodikirira ija?</i> | Yes 1<br>No 2<br>Don't know 88<br>No Response 99                                                                                                                                                                                                                                                                                                                                                                                                                               | "No" → Q20 |
| <b>17</b> | <i>Nanga ndi maphunziro anji amene munapanga nawo?</i><br>Which educational sessions did you attend at the Waiting Home? (Check all that apply)               | Family planning 1<br>Nutrition 2<br>Breastfeeding 3<br>HIV Prevention, Care 4<br>Baby care 5<br>Postpartum care 6<br>Danger signs in pregnancy 7<br>Danger signs in post-delivery 8<br>Personal Hygiene 9<br>Environmental hygiene 10<br>Birth readiness 11<br>Immunizations 12<br>Healthy living through activities 13<br>Male championship 14<br>Infections in pregnancy 15<br>Permaculture 16<br>Arts and crafts 17<br>____ Other 18<br>Don't remember 88<br>No Response 99 |            |
| <b>18</b> | <i>Kodi mungatchule mitu itatu imene mwaphunzira zinthu zokuthandizani?</i><br>Which 3 topics did you learn the most from?                                    | <hr/> <hr/> <hr/>                                                                                                                                                                                                                                                                                                                                                                                                                                                              |            |
| <b>19</b> | <i>Nanga pali zinthu zimene inuyo munakonda mutaphunzirapo?</i><br>What other topics would you have liked to be taught?                                       | <hr/> <hr/> <hr/>                                                                                                                                                                                                                                                                                                                                                                                                                                                              |            |

|  |  |  |  |  |
|--|--|--|--|--|
|  |  |  |  |  |
|--|--|--|--|--|

|    |                                                                                                                                                                         |                                                                                                                                                                                                                                                                                                |                                                             |
|----|-------------------------------------------------------------------------------------------------------------------------------------------------------------------------|------------------------------------------------------------------------------------------------------------------------------------------------------------------------------------------------------------------------------------------------------------------------------------------------|-------------------------------------------------------------|
| 20 | <i>Kodi ndi njira ziti zakulera zimene mukudziziwa ?</i><br>What modern family planning method(s) do you know? (Circle all that are mentioned)                          | None 1<br>Natural family planning 2<br>Withdrawal 3<br>Breastfeeding 4<br>Male condom 5<br>Female condom 6<br>Oral contraceptive pill 7<br>Emergency contraceptive pill 8<br>Injection 9<br>Implant 10<br>IUCD 11<br>Tubal sterilization 12<br>Vasectomy 13<br>_____ Other 14<br>Don't know 88 |                                                             |
| 21 | <i>Kodi munaphunzira kuti za njira zakulera zamakono?(Chongani zonse zimene atchula)</i><br>Where did you learn about "Modern Family Planning"? (Circle all that apply) | Here at the MWH 1<br>Another clinic 2<br>Family member/friend 3<br>Village leader 4<br>_____ Other 7<br>Don't remember 88                                                                                                                                                                      |                                                             |
| 22 | <i>Kodi mmene mwabelekamu, mugwiritisa njira iri yonse yolera?</i><br>Following this delivery, are you planning to use any family planning method?                      | Yes 1<br>No 2<br>Don't know 88<br>No Response 99                                                                                                                                                                                                                                               | <b>"No" → Q24</b><br><b>"88" → Q24</b><br><b>"99" → Q24</b> |
| 23 | <i>Nanga njira imene mukufuna kugwiritso nchito ndi iti?</i><br>If yes, which method will you use?                                                                      | None 1<br>Natural family planning 2<br>Withdrawal 3<br>Breastfeeding 4<br>Male condom 5<br>Female condom 6<br>Oral contraceptive pill 7<br>Emergency contraceptive pill 8<br>Injection 9<br>Implant 10<br>IUCD 11<br>Tubal sterilization 12<br>Vasectomy 13<br>_____ Other 14<br>Don't know 88 | <b>All responses go to Q25</b>                              |
| 24 | <i>Nanga ndi chifukwa chiani simukufuna kutenga njira yolera pano?</i><br>If you would not consider using a modern family planning method, why not?                     | Women gain weight 1<br>Women become sterile 2<br>Men don't like women who use contraceptives 3<br>Fear of side effects 4<br>Other 5<br>Don't know 6                                                                                                                                            |                                                             |

|  |  |  |  |  |
|--|--|--|--|--|
|  |  |  |  |  |
|--|--|--|--|--|

**SECTION 4: GENERAL PREGNANCY KNOWLEDGE**

| #  | Question                                                                                                                                                                                                                                            | Response Options                                                                                                                  | Go To |
|----|-----------------------------------------------------------------------------------------------------------------------------------------------------------------------------------------------------------------------------------------------------|-----------------------------------------------------------------------------------------------------------------------------------|-------|
| 25 | <i>Kodi mukuganiza kuti mayi wapakati ayendere sikelo kangati kuti alandire chithandizo chokwanira?</i><br>In your opinion, how many antenatal/prenatal care visits should a pregnant woman get in order to get adequate care throughout pregnancy? | None 1<br>One 2<br>Two 3<br>Three 4<br>Four 5<br>More than four 6<br>Other 7<br>Don't know 88<br>No Response 99                   |       |
| 26 | <i>Nanga ndi msinkhu wabwino woti mzimayi ayambe kubereka ndi zaka zingati?</i><br>What is the best age for a woman to start bearing children?                                                                                                      | Below 16 years 1<br>17 to 19 years 2<br>20 and above 3<br>Other number (write in) 4<br>[ ] [ ]<br>Don't know 88<br>No Response 99 |       |

**SECTION 5: PERMACULTURE & HOME CRAFT KNOWLEDGE**

| #  | Question                                                                                                                                                                                             | Response Options                                                                                                                                    | Go To |
|----|------------------------------------------------------------------------------------------------------------------------------------------------------------------------------------------------------|-----------------------------------------------------------------------------------------------------------------------------------------------------|-------|
| 27 | <i>Kodi mungapange bwanji kuti mukhale ndi ndiwo zamasamba ndi zipatso pakhomo panu?</i><br>What can you do to ensure you have vegetables, fruits in your household? (Circle all that are mentioned) | Create a garden from pieces of land within their household 1<br>Use organic manure 2<br>Recycle used water at home for watering garden 3<br>Other 4 |       |
| 28 | <i>Kodi chimene mungapange ndi chiyani kuti muzipeza ndalama zokuthandizirani pakhomo?</i><br>What income generating activities have you had training in? (Circle all that apply)                    | Small businesses e.g. selling vegetables and farm produce 1<br>Getting small loans 2<br>Producing arts and crafts for sale 3<br>Others 4            |       |

**SECTION 6: PLEASE RATE THE FOLLOWING ASPECTS OF THE MATERNITY WAITING HOME:**

| Question: Please rate the following: |                                                                                                                                             | Response options      |                       |                       |                       |                       |                       |
|--------------------------------------|---------------------------------------------------------------------------------------------------------------------------------------------|-----------------------|-----------------------|-----------------------|-----------------------|-----------------------|-----------------------|
|                                      |                                                                                                                                             | Poor 1                | Fair 2                | Good 3                | Very Good 4           | Excellent 5           | Don't Know 88         |
| 29                                   | <i>Kodi malo amene pali nyumba yodikirayi pali bwanji?</i><br>The location of the Maternity Waiting Home within the health facility grounds | <input type="radio"/> |
| 30                                   | <i>Kodi masana panyumayi phokoso linali bwanji?</i><br>The noise level during the day                                                       | <input type="radio"/> |
| 31                                   | <i>Nanga nthawi yausiku, phokoso linali bwanji?</i><br>The noise level at night                                                             | <input type="radio"/> |
| 32                                   | <i>Nanga mumawala bwanji?</i><br>The amount of light                                                                                        | <input type="radio"/> |
| 33                                   | <i>Nanga madzi ophikira ndi akumwa ndi wokwanira bwanji?</i><br>The amount of water for drinking/cooking                                    | <input type="radio"/> |
| 34                                   | <i>Nanga madzi osamba ndi wokwanira bwanji?</i>                                                                                             | <input type="radio"/> |

|  |  |  |  |  |
|--|--|--|--|--|
|  |  |  |  |  |
|--|--|--|--|--|

|    |                                                                                         |                       |                       |                       |                       |                       |                       |
|----|-----------------------------------------------------------------------------------------|-----------------------|-----------------------|-----------------------|-----------------------|-----------------------|-----------------------|
|    | The <b>amount</b> of water for bathing                                                  |                       |                       |                       |                       |                       |                       |
| 35 | <i>Nanga ukhondo wa ku zimbuzi uli bwanji?</i><br>The cleanliness of the toilets        | <input type="radio"/> |
| 36 | <i>Nanga malo ophikira ali bwino bwanji?</i><br>The kitchen/food preparation facilities | <input type="radio"/> |
| 37 | <i>Nanga pamalo ndi potetezeka bwanji?</i><br>Your sense of personal safety/security.   | <input type="radio"/> |

## SECTION 7: OVERALL RATINGS AND RECOMMENDATIONS

| #  | Question                                                                                                                                                                         | Response Options               |
|----|----------------------------------------------------------------------------------------------------------------------------------------------------------------------------------|--------------------------------|
| 38 | <i>Kodi mmene mwakhalira mnyumba yodikirirayi, mugakauze anzanu kuti naowonso azapange chidikiro konkuno?</i><br>Would you recommend the Waiting Home to your friends or family? | Yes 1<br>No 2<br>Don't know 88 |
| 39 | <i>Nanga mukazakhala ndi pakati pena, mungazapangenso chidikiro pompano?</i><br>Would you use the Waiting Home again if needed?                                                  | Yes 1<br>No 2<br>Don't know 88 |
| 40 | <i>Kodi pali chimene chingakonzedwe kuti amai adzikhala mokondwera panyumba yodikirirayi?</i><br>How could the maternity waiting home be improved?                               | Open response (write in)       |
| 41 | <i>Nanga pali zina zimene mungatiudziwitse kuti tikonze panyuma yodikirirayi?</i><br>What other things should we know about the Waiting Home that would help us make it better?  | Open response (write in)       |
